1                   **Quantification of the effect of site-specific histone acetylation**  
2                                   **on chromatin remodeling rate**

3  
4           Masatoshi Wakamori<sup>1</sup>, Kohki Okabe<sup>2,3,\*</sup>, Kiyoe Ura<sup>3,4</sup>, Takashi Funatsu<sup>2</sup>, Masahiro  
5                                   Takinoue<sup>3,5,\*</sup>, Takashi Umehara<sup>1,3,\*</sup>

6  
7   <sup>1</sup>Laboratory for Epigenetics Drug Discovery, RIKEN Center for Biosystems Dynamics  
8   Research, Yokohama, Kanagawa, Japan. <sup>2</sup>Graduate School of Pharmaceutical Sciences,  
9   The University of Tokyo, Hongo, Bunkyo-ku, Tokyo. <sup>3</sup>PRESTO, Japan Science and  
10   Technology Agency (JST), Kawaguchi, Saitama, Japan. <sup>4</sup>Graduate School of Science,  
11   Chiba University. <sup>5</sup>Department of Computer Science, Tokyo Institute of Technology,  
12   Yokohama, Kanagawa, Japan.

13  
14   \*Correspondence and requests for materials should be addressed to K.O. (email:  
15   [okabe@mol.f.u-tokyo.ac.jp](mailto:okabe@mol.f.u-tokyo.ac.jp)), M.T. (email: [takinoue@c.titech.ac.jp](mailto:takinoue@c.titech.ac.jp)) or T.U. (email:  
16   [takashi.umehara@riken.jp](mailto:takashi.umehara@riken.jp)).

17 **Abstract**

18 Eukaryotic transcription is epigenetically regulated by chromatin structure and post-  
19 translational modifications (PTMs). For example, lysine acetylation in histone H4 is  
20 correlated with activation of RNA polymerase I-, II-, and III-driven transcription from  
21 chromatin templates, which requires prior chromatin remodeling. However,  
22 quantitative understanding of the contribution of particular PTM states to the  
23 sequential steps of eukaryotic transcription has been hampered partially because  
24 reconstitution of a chromatin template with designed PTMs is difficult. In this study, we  
25 reconstituted a di-nucleosome with site-specifically acetylated or unmodified histone  
26 H4, which contained two copies of the *Xenopus* somatic 5S rRNA gene with addition of  
27 a unique sequence detectable by hybridization-assisted fluorescence correlation  
28 spectroscopy. Using a *Xenopus* oocyte nuclear extract, we analyzed the time course of  
29 accumulation of nascent 5S rRNA transcripts generated on chromatin templates *in vitro*.  
30 Our mathematical model and fitting analyses revealed that tetra-acetylation of histone  
31 H4 at K5/K8/K12/K16 increases the chromatin remodeling rate ~3-fold in comparison  
32 with the absence of acetylation. We provide a mathematical model for quantitative  
33 evaluation of the contribution of epigenetic modifications to chromatin transcription.

34

35 Keywords: chromatin, epigenetics, FCS, genetic code expansion, *Xenopus laevis*.

36 Eukaryotic genes are transcribed by three classes of multisubunit DNA-dependent RNA  
37 polymerases (RNAPs)<sup>1</sup>. Ribosomal RNA (rRNA) genes, protein-coding genes, and short  
38 non-coding genes, including those for 5S rRNA and transfer RNA (tRNA), are transcribed  
39 by RNAP I, II, and III, respectively<sup>2-4</sup>. Because eukaryotic genomic DNA interacts with  
40 positively charged histone proteins and is compacted into chromatin, gene transcription  
41 is regulated not only by processes involving a naked DNA template—such as the  
42 recruitment of general transcription factors and RNAPs to the promoter, initiation, and  
43 elongation—but also by processes involving a chromatin template, such as chromatin  
44 accessibility for the transcription machinery and chromatin remodeling<sup>5,6</sup>. The structural  
45 unit of chromatin, the nucleosome, is formed by wrapping DNA (145–147 bp) around  
46 the histone octamer, which consists of two copies of each of the core histones (H2A,  
47 H2B, H3, and H4)<sup>7,8</sup>. Each core histone has a lysine (K)-rich N-terminal tail that protrudes  
48 through nucleosomal DNA, and these lysine residues are subjected to post-translational  
49 modifications (PTMs) such as acetylation, methylation, and ubiquitination<sup>9</sup>. Lysine  
50 acetylation (Kac) of the histone H4 tail facilitates chromatin transcription by RNAPs I, II,  
51 and III in comparison with unmodified histone H4<sup>10-16</sup>; this presumably occurs by  
52 enhancing the remodeling or repositioning (or both) of the nucleosome positioned near  
53 the transcription start site<sup>17,18</sup>.

54 The N-terminal tail of histone H4 has four major acetylation sites (K5, K8, K12, and  
55 K16), which are highly conserved from yeast to human. These lysines can be acetylated  
56 by histone acetyltransferases, and the number of acetylated residues correlates with  
57 RNA transcription activity<sup>15,16,19</sup>. Among several H4 acetylation states<sup>20-23</sup>, tetra-  
58 acetylation at K5/K8/K12/K16 is particularly important, because this hyperacetylated  
59 state is found in euchromatin regions where the nearby genes are transcriptionally most

60 active<sup>24</sup>. H4 acetylation at K5/K8/K12/K16 correlates with the expression of both the  
61 RNAP II- and III-transcribed genes<sup>15,16</sup>. However, the contribution of each modification  
62 state of each histone to the sequential steps of chromatin transcription is yet to be  
63 quantified because of the difficulty in precise reconstitution of a chromatin template  
64 with the epigenetic modification(s) of interest<sup>25</sup>. Using genetic code expansion and cell-  
65 free protein synthesis, we synthesized histone H4 containing designed site-specific  
66 acetylation(s) and reconstituted a H4-K5/K8/K12/K16-tetra-acetylated nucleosome<sup>26,27</sup>.  
67 Despite the suggested importance of tetra-acetylation at K5/K8/K12/K16, this  
68 modification does not affect the crystal structure of the nucleosome core particle<sup>27</sup>.  
69 Therefore, the effect of histone H4 acetylation on the dynamics of the nucleosome core  
70 needs to be analyzed.

71 Because the 5S rRNA gene can be chromatinized with a single nucleosome, it has  
72 been used as a model gene in an *in vitro* chromatin transcription assay<sup>28,29</sup>. When whole  
73 histones including the H4 tail are acetylated in a di-nucleosome chromatin template  
74 containing a tandem of two 5S rRNA gene cassettes (*i.e.* X5S197-2<sup>28</sup>), 5S rRNA  
75 transcription is activated *in vitro*<sup>28</sup>. However, it is difficult to monitor transcription in real  
76 time because *in vitro* transcripts are usually detected by electrophoresis using  
77 radioisotope-labeled UTP.

78 In this study, we developed a di-nucleosome tandem *Xenopus* 5S rRNA gene cassette  
79 with a unique sequence derived from *c-fos*. Hybridization of nascent transcripts  
80 containing this sequence with the corresponding antisense fluorescent probe enabled  
81 real-time monitoring of transcript accumulation in a *Xenopus* oocyte nuclear extract by  
82 fluorescence correlation spectroscopy (FCS). We reconstituted the di-nucleosome  
83 chromatin template with non-acetylated or tetra-acetylated histone H4 and monitored

84 accumulation of 5S transcripts. Mathematical modeling allowed us to determine the  
85 rates of chromatin remodeling from non-acetylated and H4-tetra-acetylated chromatin  
86 templates. The methodology developed in this study can be used for quantitative  
87 analysis of the contribution of epigenetic modification(s) to chromatin transcription.

88

## 89 **Results**

90 **Scheme of chromatin transcription, transcript detection, and modeling.** The  
91 reconstituted RNAP III-driven chromatin transcription system used is shown in Fig. 1. For  
92 analyzing the essential dynamics of chromatin transcription, we postulated four steps  
93 on the basis of published data, each representing a chromatin state or reaction: (1)  
94 chromatin accessibility, (2) chromatin remodeling, (3) priming before transcription, and  
95 (4) 5S rRNA transcription.

96 Chromatin accessibility (1) for *trans*-acting factors can be evaluated by using  
97 enzymes that act on DNA, such as micrococcal nuclease (MNase), DNase I, or  
98 transposase<sup>30</sup>. Chromatin remodeling factors or histone chaperones, or both, may  
99 access the chromatin template at different rates, depending on the presence or absence  
100 of histone acetylation. Chromatin remodeling (2) includes remodeling or repositioning  
101 (or both) of the nucleosome around the transcription start site. Chromatin remodeling  
102 factors such as RSC (remodel the structure of chromatin), or histone chaperones such as  
103 FACT (facilitates chromatin transcription), or both, allow access of *trans*-acting factors  
104 (*e.g.*, transcriptional machinery) to DNA through relocation of the nucleosome at the  
105 transcription start site, which is observed in both RNAP II and III-transcribed genes<sup>31-33</sup>.  
106 The extent to which a certain histone acetylation state facilitates chromatin remodeling  
107 and nucleosome repositioning remains unclear<sup>28,34,35</sup>. Priming before transcription (3)

108 includes sequential assembly of the transcription preinitiation complex of general  
109 transcription factors TFIIIA/TFIIB/TFIIC and RNAP III at the promoter<sup>36-39</sup>. Finally, 5S  
110 rRNA is transcribed by RNAP III (4). During RNAP III-dependent transcription elongation,  
111 the histone core is moving from a position on the DNA template ahead of RNAP III to a  
112 position behind it<sup>40-42</sup>. Single nascent transcripts hybridizing with a fluorescent RNA  
113 probe can be counted in real time by FCS microscopy. Using the above literature-based  
114 chromatin transcription model, we aimed to establish a mathematical model to quantify  
115 the contribution of a certain epigenetic modification state (tetra-acetylation of histone  
116 H4 in this study) to chromatin transcription.

117

118 **Atomic force microscopy (AFM) imaging and micrococcal nuclease (MNase) digestion**  
119 **of the H4-tetra-acetylated di-nucleosome.** We reconstituted a di-nucleosome in which  
120 two copies of *Xenopus* somatic 5S rRNA gene were connected in tandem (Fig. 2A and  
121 Supplementary Fig. 1)<sup>25</sup> and recombinant human histone H4 was either unmodified or  
122 tetra-acetylated at K5/K8/K12/K16<sup>26,27</sup>. Site-specific acetylation of histone H4 at  
123 K5/K8/K12/K16 was confirmed by Western blotting using specific monoclonal  
124 antibodies (Fig. 2B). Histone octamers containing K5/K8/K12/K16-tetra-acetylated H4  
125 (hereafter referred as 4Kac) or unmodified H4 together with bacterially expressed core  
126 histones H2A, H2B, and H3<sup>43</sup> were assembled and purified. Using unmodified or 4Kac  
127 histone octamers, 5S rRNA gene di-nucleosomes were reconstituted with either the  
128 X5S197-2 template DNA (Fig. 2A, top; Supplementary Fig. 1A)<sup>25,28</sup> or the newly designed  
129 X5S217F-2 template DNA (Fig. 2A, bottom; Supplementary Fig. 1B); X5S217F-2 had an  
130 insertion of a 20-bp human *c-fos*-derived annealing sequence (which is absent in the

131 *Xenopus* genome) at the +115 position downstream of the 5S rRNA gene for specific  
132 detection of 5S rRNA nascent transcripts.

133           Using AFM imaging, we found that the unmodified (Fig. 2C) and 4Kac (Fig. 2D)  
134 X5S197-2 di-nucleosomes had similar dumbbell-shaped structures. DNA length between  
135 the two nucleosome cores did not differ significantly between unmodified di-  
136 nucleosomes ( $41 \pm 12$  nm;  $N = 50$ ) and 4Kac di-nucleosomes ( $44 \pm 10$  nm;  $N = 50$ ). We  
137 next compared the biochemical accessibilities of micrococcal nuclease (MNase) to the  
138 unmodified and 4Kac X5S197-2 di-nucleosomes (Fig. 2E). Toward both di-nucleosomes  
139 (424 bp), MNase yielded approximately 145-bp DNA fragments that matched the length  
140 of mono-nucleosomal DNA (145–147 bp). The sizes and amounts of this partially  
141 digested DNA did not differ between unmodified and 4Kac di-nucleosomes (Fig. 2E),  
142 suggesting that they had the same chromatin accessibility. Unmodified and 4Kac di-  
143 nucleosomes reconstituted with X5S217F-2 template DNA (Fig. 2F) were used for real-  
144 time chromatin transcription assay.

145

146 **Chromatin transcription and its real-time detection by FCS.** The X5S217F-2 di-  
147 nucleosomes were transcribed in a *Xenopus* oocyte nuclear extract, which contains  
148 RNAP III. An antisense RNA probe (20-nt-long Cy3-labeled 2'-O-methyl; 2OMe)<sup>44</sup> was  
149 added to this system to bind to the complementary *c-fos*-derived annealing sequence in  
150 the nascent 140-nt 5S rRNA transcript (Fig. 3A). Hybridization was assessed in real time  
151 at high resolution as an increase in the diffusion time of the fluorescent antisense probe  
152 detected by FCS<sup>45-47</sup> (Fig. 3B). When the engineered 5S rRNA is transcribed in the  
153 reaction mixture, the diffusion time of the antisense probe, as determined from the  
154 fluorescence autocorrelation function (FAF), was extended by sequence-dependent

155 hybridization, whereas 5S rRNA lacking the *c-fos* sequence did not extend the diffusion  
156 time of the fluorescent antisense probe (Fig. 3C). For calibration of the transcription  
157 level, different concentrations of the engineered 5S rRNA that had been transcribed by  
158 T7 RNA polymerase were added to the reaction that contained all components except  
159 the DNA template, and we conducted FCS measurements after 10-min incubation. The  
160 relationship between the change in log RNA concentration and averaged diffusion time  
161 of antisense probe in reaction mixture could be linearly approximated with an excellent  
162 fit (correlation coefficient = 0.99; Fig. 3D), confirming that the concentration of nascent  
163 transcripts can be quantified by measuring probe diffusion time.

164 By using a custom-made lid as a cover glass to prevent evaporation, we  
165 obtained FAF using as little as 5  $\mu$ l of the reaction mixtures, thus enabling us to measure  
166 the concentrations of nascent transcripts *in vitro* in real time (Fig. 3E). As expected, no  
167 RNA synthesis was observed for X5S197-2 naked DNA, which has no probe-annealing  
168 sequence, whereas an increase in RNA concentration in a time-dependent manner was  
169 observed for X5S217F-2 naked DNA (Fig. 3E). Transcription from the H4-tetra-acetylated  
170 di-nucleosome was greater than that from the unmodified di-nucleosome, but both  
171 were lower than that from the naked template (Fig. 3E). Hence, these results  
172 demonstrate that site-specific acetylation of histone H4 activates chromatin  
173 transcription *in vitro*.

174

175 **Mathematical modeling and analyses of chromatin transcription.** To quantify the  
176 chromatin transcription kinetics, we constructed a simple mathematical model based on  
177 steps (1)–(4) shown in Fig. 1. The definitions of the variables and parameters in our  
178 mathematical model explained below are summarized in Supplementary Table 1. First,



179 the concentration of accessible chromatin is expressed by  $\alpha_\xi C$ , where  $\xi$  is the type of  
180 chromatin template containing the *c-fos*-derived annealing sequence (' $\xi$ ' = '4Kac' for  
181 H4-tetra-acetylated chromatin DNA or 'unmod' for unmodified chromatin DNA);  $C$  (=   
182 300 nM, fixed) is the concentration of the template ('4Kac' and 'unmod'); and  $\alpha_\xi$  is  
183 accessibility of chromatin ' $\xi$ '. Given  $X_\xi(t)$  and  $Y_\xi(t)$  are the concentrations of the  
184 remodeled chromatin ' $\xi$ ' and primed chromatin ' $\xi$ ' at time  $t$ , respectively, the  
185 concentration of chromatin ' $\xi$ ' to be remodeled is  $(\alpha_\xi C - X_\xi - Y_\xi)$  (Fig. 4A). The  
186 chromatin remodeling reaction is described as

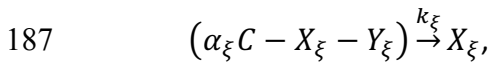

188 where  $k_\xi$  is the remodeling rate of chromatin ' $\xi$ '. Thus, the priming reaction before  
189 transcription is described as

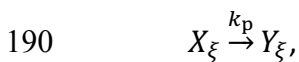

191 where  $k_p$  is the priming rate of remodeled chromatin ' $\xi$ '. Finally, 5S rRNA transcription  
192 reaction is described as follows by assuming the Michaelis–Menten-type enzymatic  
193 reaction

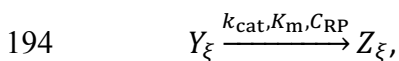

195 where  $Z_\xi(t)$  are the concentrations of the transcribed RNA produced from chromatin  
196 ' $\xi$ ' at time  $t$ ;  $k_{\text{cat}}$ ,  $K_m$ , and  $C_{\text{RP}}$  are the turnover number, the Michaelis–Menten constant,  
197 and the concentration of RNAP III, respectively.

198 From the chemical reaction model, we have the following ordinary differential  
199 equations:

$$200 \quad \frac{dX_\xi}{dt} = k_\xi (\alpha_\xi C - X_\xi - Y_\xi) - k_p X_\xi, \quad (1)$$

201 
$$\frac{dY_\xi}{dt} = k_p X_\xi, \quad (2)$$

202 
$$\frac{dZ_\xi}{dt} = \frac{k_{\text{cat}}C_{\text{RP}}Y_\xi}{K_m + Y_\xi} \sim \frac{k_{\text{cat}}C_{\text{RP}}}{K_m} Y_\xi, \quad (3)$$

203 where  $K_m \gg C > Y_\xi$  because  $K_m$  for eukaryotic RNA polymerase III is 7 to 83  $\mu\text{M}$ <sup>48</sup>  
 204 and  $C$  in this study was 300 nM. By solving equations (1) – (3) under the initial condition  
 205  $X_\xi(0) = Y_\xi(0) = Z_\xi(0) = 0$ , the kinetics of 5S rRNA transcription from the H4-tetra-  
 206 acetylated chromatin DNA and the unmodified chromatin DNA is obtained as

207 
$$Z_\xi = \gamma\alpha_\xi \left[ t - \left\{ \frac{k_p}{k_\xi(k_\xi - k_p)} e^{-k_\xi t} + \frac{k_\xi + k_p}{k_\xi k_p} - \frac{k_\xi}{k_p(k_\xi - k_p)} e^{-k_p t} \right\} \right], \quad (4)$$

208  
 209 where  $\xi$  is ‘4Kac’ or ‘unmod’;  $\gamma = \frac{k_{\text{cat}}C_{\text{RP}}}{K_m}$  is the transcription rate; the term  $\gamma\alpha_\xi t$   
 210 means pure transcription without the need for chromatin remodeling or priming; the  
 211 term  $-\left\{ \frac{k_p}{k_\xi(k_\xi - k_p)} e^{-k_\xi t} + \frac{k_\xi + k_p}{k_\xi k_p} - \frac{k_\xi}{k_p(k_\xi - k_p)} e^{-k_p t} \right\}$  indicates the pre-transcription  
 212 time delay caused by chromatin remodeling and priming (Fig. 4B).

213 By taking the limit of  $k_\xi t \rightarrow \infty$ ,  $k_p/k_\xi \rightarrow 0$ , and  $\alpha_\xi = 1$  in equation (4), the  
 214 kinetics of 5S rRNA transcription from the naked DNA containing the *c-fos*-derived  
 215 annealing sequence are

216 
$$Z_{\text{naked}} = \gamma \left[ t - \frac{1 - e^{-k_p t}}{k_p} \right], \quad (5)$$

217 where  $Z_{\text{naked}}$  are the concentrations of the transcribed RNA produced from ‘naked’  
 218 DNA at time  $t$  (Fig. 4C).

219 Using equations (4) and (5), we simulated dynamics of chromatin transcription  
 220 with different  $k_{4\text{Kac}}$  (Fig. 4D) and different  $\alpha_{4\text{Kac}}$  (Fig. 4E). It was confirmed that the  
 221 chromatin remodeling rate  $k_\xi$  contributes to the time delay, not to the final slope of

222 the kinetics (Fig. 4D). On the other hand, the accessibility  $\alpha_{\xi}$  contributes to the final  
223 slope of the kinetics, not to the time delay (Fig. 4E).

224 Subsequently, we estimated the kinetic parameters of chromatin transcription by  
225 fitting the experimental data to the mathematical model using the computing software  
226 Mathematica 11.3 (Wolfram Research, Champaign, IL, USA). First, by fitting the  
227 transcription data of the naked DNA to equation (5), the transcription rate  $\gamma$  and the  
228 priming rate  $k_p$  were determined (Fig. 5A):  $\gamma \sim 0.046 \text{ nM min}^{-1}$  and  $k_p \sim 0.13 \text{ min}^{-1}$ . These  
229 values were used to estimate the kinetics of transcription from all types of DNA  
230 templates. Next, assuming  $\alpha_{4\text{Kac}} = \alpha_{\text{unmod}} = 1$ , fitting the 5S rRNA transcription data  
231 of the H4-tetra-acetylated and unmodified chromatin DNA to equation (4) (Fig. 5B)  
232 resulted in the chromatin remodeling rates  $k_{4\text{Kac}} \sim 0.12 \text{ min}^{-1}$  and  $k_{\text{unmod}} \sim 0.039 \text{ min}^{-1}$ .  
233 Because all coefficients of determination,  $R^2$ , were sufficiently large ( $>0.93$ ), the fitting  
234 was considered to have been performed properly (Fig. 5A and 5B). This suggests that  
235 the mathematical model constructed here can express the transcriptional dynamics. In  
236 addition, to examine the adequacy of the assumption of  $\alpha_{4\text{Kac}} = \alpha_{\text{unmod}} = 1$ , we fitted  
237 the data for  $\alpha_{\text{unmod}} = 0.8 - 1$  (Supplementary Fig. 2). Because the  $k_{\text{unmod}}$  and  $R^2$   
238 values did not change much even when  $\alpha_{\text{unmod}}$  was changed, the simplest assumption  
239 of  $\alpha_{4\text{Kac}} = \alpha_{\text{unmod}} = 1$  was adopted on the basis of the results of MNase digestion  
240 assays (Fig. 2E). Thus, the mathematical analysis shows the remodeling rate of H4-tetra-  
241 acetylated chromatin DNA to be approximately 3-fold that of unmodified chromatin  
242 DNA ( $k_{4\text{Kac}} / k_{\text{unmod}} \sim 3.1$ ) (Fig. 5C).

243

244 **Discussion**

245 Although it has been known since the 1960s that acetylation of N-terminal tails of core  
246 histones facilitates chromatin transcription<sup>10,49</sup>, the contribution of each histone  
247 modification state has not been quantified. In this study, we have developed a  
248 methodology for such quantification by a fluorescence-based transcription tracking  
249 method in a reconstituted system and mathematical modeling.

250 To understand the role of a particular epigenetic modification, a protein with  
251 this modification has to be produced, for example by enzymatic modification<sup>50</sup>, native  
252 chemical ligation<sup>51</sup>, or genetic code expansion<sup>52,53</sup>. To produce H4 histone with four sites  
253 specifically acetylated, we combined genetic code expansion and cell-free protein  
254 synthesis, but other methods may also be used. By comparing RNAP III-driven  
255 transcription dynamics in unmodified and H4-tetra-acetylated di-nucleosomes  
256 containing 5S rRNA gene cassettes, we established a platform to evaluate the rates of  
257 transcription and chromatin remodeling. In this assay, the increase in chromatin  
258 remodeling rate by H4 tetra-acetylation was approximately 3-fold ( $k_{4\text{Kac}} / k_{\text{unmod}} \sim 3.1$ ).  
259 This rate may be further increased by site-specific acetylation of other core histone  
260 subunits<sup>15</sup>. Because the methodology developed here is versatile, the roles of other  
261 histone PTMs (such as methylation and ubiquitination) can also be quantified. The  
262 model may also be used for RNAP II-driven chromatin transcription, chromatin DNA  
263 replication, and other aspects of DNA metabolism.

264 Real-time measurement of transcription in crude extracts is challenging  
265 because the absolute amount of the reconstituted chromatin template is usually small,  
266 which makes conventional measurements in a cuvette difficult. In this study, we  
267 overcame this problem by using a fluorescent probe with high affinity and specificity,  
268 and highly sensitive detection by FCS. Measurements of molecular diffusion by FCS

269 reduces the likelihood of obtaining false positives, which is a problem when solely  
270 detecting a change in fluorescence. Furthermore, FCS, based on single molecule  
271 counting, enables detection of RNA newly synthesized from a very small amount of  
272 template. We found that minimization of the reaction volume (*e.g.*, less than 5  $\mu$ l) and  
273 extension of the measurement time (*e.g.*, more than 20 min) are technical bottlenecks  
274 caused by evaporation of the reaction solution during the measurement. Considering  
275 the femtoliter order of the FCS measurement region, much smaller volumes and longer  
276 measurements can be achieved by integration with microfluidic device technologies. By  
277 using the developed transcription tracking method in a reconstituted system, the effects  
278 of chemical factors (*e.g.*, other PTMs, ions, pH) and physical factors (*e.g.*, temperature,  
279 viscosity, congestion) on the dynamics of chromatin transcription can be investigated.  
280 Considering the highly quantitative nature of FCS and the requirement for just a few-  
281 microliter reaction volume, the present methodology may also be applicable to a living  
282 cell<sup>47</sup>.

283         Our mathematical model quantitatively describes the chromatin remodeling  
284 step of eukaryotic chromatin transcription although it does not explicitly describe  
285 nucleosome positioning and preinitiation complex formation. We obtained the  
286 chromatin remodeling rates  $k_{4\text{Kac}}$  and  $k_{\text{unmod}}$  and confirmed the validity of data fitting, as  
287 judged from their biochemically reasonable values. The remodeling rate of H4-tetra-  
288 acetylated chromatin was approximately 3 times that of unmodified chromatin. This  
289 finding is important for characterization of the effect of this modification: despite little  
290 structural difference from unmodified chromatin, H4-tetra-acetylated chromatin  
291 showed considerably more active dynamics of transcription. The effect of the difference

292 in chromatin remodeling rates observed in this study will be clearer when our  
293 methodology is applied to living cells or other PTMs.

294 The constructed mathematical model [equation (4)] provides insights into  
295 chromatin transcription. When focusing on a very short-term process ( $k_{\xi}t \ll 1$ ),  $Z_{\xi} \rightarrow$   
296  $\frac{1}{6}\gamma\beta_{\xi}t^3$ , where  $\beta_{\xi} = \alpha_{\xi}k_p k_{\xi}$  ( $\text{min}^{-2}$ );  $(k_{\text{cat}}\beta_{\xi})^{\frac{1}{3}}$  ( $\text{min}^{-1}$ ) is an apparent initial rate of  
297 chromatin transcription. If very short-term transcription kinetics are quantitatively  
298 measured,  $\beta_{\xi}$  or  $(k_{\text{cat}}\beta_{\xi})^{\frac{1}{3}}$  can be used for classifying chromatin transcription in  
299 various epigenetic modification states. When focusing on a long-term process ( $k_{\xi}t \gg$   
300  $1, k_p t \gg 1$ ),  $Z_{\xi} \rightarrow \gamma\alpha_{\xi}t$ ; thus, by measuring the slope of chromatin transcription,  
301 chromatin accessibility can be determined more precisely, although in this study it was  
302 assumed to be 1 on the basis of the results of MNase digestion assays.

303 In summary, we established an *in vitro* reconstitution system to quantify the  
304 contribution of a certain epigenetic modification state to chromatin transcription  
305 dynamics. As a model case, we compared the kinetics of chromatin remodeling and  
306 transcription between unmodified and H4-tetra-acetylated chromatin templates.  
307 Chromatin templates with certain PTMs, such as site-specific acetylation, can be used in  
308 crude extracts in which the product molecules of interest can be counted in real time.  
309 Therefore, our methodology will be applicable to a wide variety of chromatin-mediated  
310 reactions for quantitative understanding of the importance of epigenetic modifications.

311

## 312 **Methods**

313 **Reconstitution of H4-acetylated histone octamers.** Core histones were prepared and  
314 histone octamers were refolded essentially as described previously<sup>54</sup>. Briefly, the full-

315 length human histones H2A type 1-B/E, H2B type 1-J, and H3.1 were produced in *E. coli*  
316 BL21 (DE3) and purified by Ni-Sepharose affinity chromatography. K5/K8/K12/K16-  
317 acetylated histone H4 was produced in an *E. coli* cell-free protein synthesis system with  
318 the expanded genetic code<sup>26</sup> as described in <sup>27</sup>. For refolding of histone octamers,  
319 equimolar amounts of histones (*i.e.*, H2A, H2B, H3, and unmodified or tetra-acetylated  
320 H4) were dissolved in 20 mM Tris-HCl buffer (pH 7.5) containing 6 M guanidine-HCl and  
321 10 mM DTT, and dialyzed against 10 mM Tris-HCl buffer (pH 7.5) containing 2 M NaCl, 1  
322 mM EDTA, and 5 mM 2-mercaptoethanol. The histone octamers were purified by size-  
323 exclusion chromatography on a Superdex 200 column (GE Healthcare).

324

325 **Preparation of di-nucleosome DNA.** The 424-bp di-nucleosome DNA fragment X5S197-  
326 2 composed of two tandem cassettes of the 197-bp *Xenopus borealis* somatic 5S rRNA  
327 gene with an upstream sequence (Fig. 2A, top) was prepared as previously described<sup>25</sup>.  
328 To produce the 479-bp di-nucleosome DNA fragment (X5S217F-2; Fig. 2A, bottom), two  
329 synthetic DNAs (250 bp and 229 bp) were purchased from Eurofins Genomics. The 250-  
330 bp DNA was the first 5S rRNA gene cassette (−108 to +142), in which a *Pvu*II site (5′-  
331 CAGCTG-3′) was inserted at the 5′ end and the *c-fos* antisense probe sequence (5′-  
332 GCGGA GACAG ACCAA CTAGA-3′) was inserted at the +115 position. The 229-bp DNA  
333 was the second 5S rRNA gene cassette (−77 to +152), in which the *c-fos* antisense probe  
334 sequence was inserted at the +115 position and the *Pvu*II site was inserted at the 3′ end.  
335 The two DNAs were ligated using a Gibson Assembly Master Mix (New England Biolabs)  
336 and subcloned into the pWMD01 vector<sup>55</sup>. The di-nucleosome DNA with the modified  
337 5S rRNA gene cassettes (X5S217F-2) was excised with *Pvu*II and purified by ion-exchange  
338 chromatography on a TSK-gel DEAE-5PW column (Tosoh Corporation).

339

340 **Reconstitution of di-nucleosome chromatin templates.** Di-nucleosomes with or  
341 without histone H4 acetylation were reconstituted by salt dialysis<sup>25</sup>. Briefly, purified  
342 histone octamers were mixed with the X5S197-2 or X5S217F-2 fragment DNA in 10 mM  
343 Tris-HCl buffer (pH 7.5) containing 2 M NaCl, 1 mM EDTA, and 1 mM 2-mercaptoethanol  
344 (histone octamer: DNA = 0.9 : 1.0 w/w), and dialyzed at 4 °C for 16 h. Then, stepwise  
345 dialysis was performed against buffers with decreasing NaCl concentrations. The  
346 reconstituted di-nucleosomes were fractionated by centrifugation in 10%–25% sucrose  
347 gradients at 36,000 rpm at 4 °C for 16 h in a Beckman SW41 rotor. Forty fractions were  
348 collected using a Piston Gradient Fractionator (BioComp) and electrophoresed in 0.5×  
349 TBE buffer at 8.5 V/cm in a 0.7% Seakem GTG agarose gel and visualized by ethidium  
350 bromide staining. Di-nucleosomes from the 20th to 22nd fractions were pooled,  
351 concentrated using an Amicon Ultra 0.5 ml 10K centrifugal filter, and dialyzed against 10  
352 mM HEPES buffer (pH 7.5) containing 100 μM EDTA; their concentration was determined  
353 from the optical density at a wavelength of 260 nm.

354

355 **Atomic force microscopy.** Di-nucleosomes (90 ng/μl) were fixed with 0.1%  
356 glutaraldehyde for 16 h at 4 °C. Immediately before measurement, they were diluted to  
357 0.45 ng/μl with 10 mM HEPES buffer (pH 7.5), placed onto APTES-treated mica<sup>56</sup> and left  
358 for 10 min. Imaging was performed using a high-speed AFM system (Nano Live Vision,  
359 RIBM, Tsukuba, Japan) with a carbon nanofiber cantilever (BL-AC10FS, Olympus) at a  
360 spring constant of 0.1 N/m in solution phase at 27 °C. Images of a 500 × 375-nm area  
361 were obtained at 2 s/frame at a resolution of 192 × 144 pixels. DNA length between two



362 nucleosome core particles was traced manually in the images and quantified using  
363 ImageJ software (version 1.45s).

364

365 **Micrococcal nuclease digestion.** DNA of di-nucleosome (100 ng) containing either tetra-  
366 acetylated or unmodified histone H4 was digested for 5 min at 22 °C with MNase (0.125  
367 to 2.0 units; Takara, cat. #2910A) in 5.5 mM Tris-HCl buffer (pH 7.6) containing 500 µM  
368 CaCl<sub>2</sub> and 50 µg/ml BSA. Digestion was terminated by addition of 20 mM EDTA and 0.5%  
369 (w/v) SDS containing 2 µg of proteinase K (Roche, cat. #3115887). DNA fragments were  
370 extracted with phenol/chloroform and analyzed by electrophoresis in a non-denaturing  
371 10% polyacrylamide gel.

372

373 **Transcription *in vitro* and transcript detection by fluorescence correlation**  
374 **spectroscopy.** Transcription was performed essentially as described<sup>57</sup>. Each reaction  
375 mixture (10 µl) contained purified di-nucleosome or naked DNA template (1 µg) , 0.9 µl  
376 of a *Xenopus* oocyte nuclear extract, 9.5 mM HEPES (pH 7.4), 100 mM NaCl, 48 mM KCl,  
377 6.7 mM MgCl<sub>2</sub>, 3.6 mM DTT, 90 µM EDTA, 4.5% (v/v) glycerol, 0.9% (w/v)  
378 polyvinylpyrrolidone, 0.06% (w/v) BSA, 500 µM NTPs, 1 µM trichostatin A, 5 units of  
379 RNase inhibitor (Toyobo, cat. #SIN-201), and 20 nM *c-fos* antisense probe. The *c-fos*  
380 probe was synthesized with a 2' O-Me RNA backbone, which was labeled with Cy3 at its  
381 3' end. FCS was conducted on a confocal laser-scanning fluorescence microscope (TCS  
382 SP8, Leica) equipped with a single molecule detection unit (PicoQuant) at 23 °C. The  
383 reaction mixture (5 µl) was covered with a stainless-steel cylinder (inner diameter, 6.2  
384 mm; length, 5 mm), one end of which was covered with a cover glass. Cy3 fluorescence  
385 was excited with a green laser (532 nm, Leica), and emitted photons were captured

386 through an objective lens (63×, HC PL APO CS2 1.20 N.A. water, Leica) with a 570DF30  
387 emission filter (Omega). Each 30-s fluorescence fluctuation measurement was  
388 performed with an avalanche photodiode (PicoQuant). Total recording time was about  
389 20 min. Autocorrelation was calculated with the SymPhoTime software (PicoQuant). The  
390 obtained fluorescence autocorrelation between 0.01 and 813 ms was approximated  
391 with SymPhoTime using the autocorrelation function [equation (6)] with one  
392 component:

$$393 \quad G(\tau) - 1 = \frac{1}{N} \times \left( \frac{1}{1+\tau/\tau_1} \right) \left( \frac{1}{1+(1/\kappa)^2(\tau/\tau_1)} \right)^{\frac{1}{2}} \quad (6)$$

394 where  $N$  is the number of fluorescent dyes in the confocal volume,  $\tau_1$  is the diffusion  
395 time, and  $\kappa$  is a structure parameter (10–15 in this experiment).

396

### 397 **Author contributions**

398 M.W., K.O., M.T., and T.U. designed the experiments, interpreted the results, and wrote  
399 the manuscript. M.W., K.U., and T.U. performed the biochemical analysis. K.O. and T.F.  
400 performed the biophysical analysis. M.T. performed the mathematical analysis. All  
401 authors commented on the manuscript.

402

### 403 **Acknowledgments**

404 We thank Hiroki R. Ueda (the University of Tokyo) for encouragement, Toshiaki Higo for  
405 sample preparation, and Yuki Saito for clerical assistance. This work was supported by  
406 grants from the PRESTO program of the Japan Science and Technology Agency (JST), and  
407 in part by Grants-in-Aid for Scientific Research on Innovative Areas to K.O. (No.  
408 15H05931) and K.U. (No. 15H01345), a Grant-in-Aid for Challenging Research  
409 (Exploratory) to M.T. (No. 18K19834), and Grants-in-Aid for Scientific Research (B) to

410 M.T. (No. 17H01813) and T.U. (No. 16H05089) from the Japan Society for the Promotion  
411 of Science (JSPS).

412

#### 413 **References**

- 414 1 Roeder, R. G. & Rutter, W. J. Multiple forms of DNA-dependent RNA polymerase in  
415 eukaryotic organisms. *Nature* **224**, 234-237 (1969).
- 416 2 Dignam, J. D., Lebovitz, R. M. & Roeder, R. G. Accurate transcription initiation by RNA  
417 polymerase II in a soluble extract from isolated mammalian nuclei. *Nucleic acids research*  
418 **11**, 1475-1489 (1983).
- 419 3 Keener, J., Josaitis, C. A., Dodd, J. A. & Nomura, M. Reconstitution of yeast RNA  
420 polymerase I transcription in vitro from purified components. TATA-binding protein is  
421 not required for basal transcription. *The Journal of biological chemistry* **273**, 33795-33802  
422 (1998).
- 423 4 Vannini, A. & Cramer, P. Conservation between the RNA polymerase I, II, and III  
424 transcription initiation machineries. *Molecular cell* **45**, 439-446,  
425 doi:10.1016/j.molcel.2012.01.023 (2012).
- 426 5 Paranjape, S. M., Kamakaka, R. T. & Kadonaga, J. T. Role of chromatin structure in the  
427 regulation of transcription by RNA polymerase II. *Annual review of biochemistry* **63**, 265-  
428 297 (1994).
- 429 6 Felsenfeld, G. Chromatin as an essential part of the transcriptional mechanism. *Nature*  
430 **355**, 219, doi:10.1038/355219a0 (1992).
- 431 7 Luger, K., Mader, A. W., Richmond, R. K., Sargent, D. F. & Richmond, T. J. Crystal  
432 structure of the nucleosome core particle at 2.8 Å resolution. *Nature* **389**, 251-260,  
433 doi:10.1038/38444 (1997).
- 434 8 Kornberg, R. D. & Lorch, Y. L. Twenty-five years of the nucleosome, fundamental particle  
435 of the eukaryote chromosome. *Cell* **98**, 285-294, doi:10.1016/S0092-8674(00)81958-3  
436 (1999).
- 437 9 Peterson, C. L. & Laniel, M.-A. Histones and histone modifications. *Current Biology* **14**,  
438 R546-R551, doi:10.1016/j.cub.2004.07.007 (2004).
- 439 10 Allfrey, V. G., Faulkner, R. & Mirsky, A. E. Acetylation and Methylation of Histones and  
440 Their Possible Role in the Regulation of RNA Synthesis. *Proceedings of the National*  
441 *Academy of Sciences of the United States of America* **51**, 786-794 (1964).
- 442 11 Lee, D. Y., Hayes, J. J., Pruss, D. & Wolffe, A. P. A positive role for histone acetylation in  
443 transcription factor access to nucleosomal DNA. *Cell* **72**, 73-84 (1993).
- 444 12 Hirschler-Laszkiewicz, I. *et al.* The role of acetylation in rDNA transcription. *Nucleic*  
445 *acids research* **29**, 4114-4124 (2001).
- 446 13 Eberharter, A. & Becker, P. B. Histone acetylation: a switch between repressive and  
447 permissive chromatin. *Second in review series on chromatin dynamics* **3**, 224-229,  
448 doi:10.1093/embo-reports/kvf053 (2002).
- 449 14 Grummt, I. & Pikaard, C. S. Epigenetic silencing of RNA polymerase I transcription.  
450 *Nature reviews. Molecular cell biology* **4**, 641-649, doi:10.1038/nrm1171 (2003).
- 451 15 Barski, A. *et al.* Pol II and its associated epigenetic marks are present at Pol III-transcribed  
452 noncoding RNA genes. *Nature structural & molecular biology* **17**, 629 (2010).
- 453 16 White, R. J. Transcription by RNA polymerase III: more complex than we thought. *Nature*  
454 *reviews. Genetics* **12**, 459-463, doi:10.1038/nrg3001 (2011).
- 455 17 Wolffe, A. P. Nucleosome positioning and modification: chromatin structures that  
456 potentiate transcription. *Trends in biochemical sciences* **19**, 240-244 (1994).
- 457 18 Jiang, C. & Pugh, B. F. Nucleosome positioning and gene regulation: advances through  
458 genomics. *Nature Reviews Genetics* **10**, 161, doi:10.1038/nrg2522 (2009).

- 459 19 Turner, B. M. Histone acetylation and control of gene expression. *Journal of cell science*  
460 **99**, 13-20 (1991).
- 461 20 Zhang, K. *et al.* Histone Acetylation and Deacetylation. *Identification of Acetylation and*  
462 *Methylation Sites of HeLa Histone H4 by Mass Spectrometry* **1**, 500-508,  
463 doi:10.1074/mcp.M200031-MCP200 (2002).
- 464 21 Smith, C. M. *et al.* Mass spectrometric quantification of acetylation at specific lysines  
465 within the amino-terminal tail of histone H4. *Analytical biochemistry* **316**, 23-33,  
466 doi:10.1016/S0003-2697(03)00032-0 (2003).
- 467 22 Wang, C. I. *et al.* ChIP-mass spectrometry captures protein interactions and modified  
468 histones associated with dosage compensation in *Drosophila*. *Nature structural &*  
469 *molecular biology* **20**, 202-209, doi:10.1038/nsmb.2477 (2013).
- 470 23 Henry, R. A. *et al.* Quantitative measurement of histone tail acetylation reveals stage-  
471 specific regulation and response to environmental changes during *Drosophila*  
472 development. *Biochemistry-Us* **55**, 1663-1672, doi:10.1021/acs.biochem.5b01070 (2016).
- 473 24 Grunstein, M. Histone acetylation in chromatin structure and transcription. *Nature* **389**,  
474 349, doi:10.1038/38664 (1997).
- 475 25 Ura, K., Hayes, J. J. & Wolffe, A. P. A positive role for nucleosome mobility in the  
476 transcriptional activity of chromatin templates: restriction by linker histones. *The EMBO*  
477 *journal* **14**, 3752-3765 (1995).
- 478 26 Mukai, T. *et al.* Genetic-code evolution for protein synthesis with non-natural amino acids.  
479 *Biochemical and biophysical research communications* **411**, 757-761,  
480 doi:10.1016/J.Bbrc.2011.07.020 (2011).
- 481 27 Wakamori, M. *et al.* Intra- and inter-nucleosomal interactions of the histone H4 tail  
482 revealed with a human nucleosome core particle with genetically-incorporated H4 tetra-  
483 acetylation. *Scientific reports* **5**, 17204, doi:10.1038/srep17204 (2015).
- 484 28 Ura, K., Kurumizaka, H., Dimitrov, S., Almouzni, G. & Wolffe, A. P. Histone acetylation:  
485 influence on transcription, nucleosome mobility and positioning, and linker histone-  
486 dependent transcriptional repression. *The EMBO journal* **16**, 2096-2107,  
487 doi:10.1093/emboj/16.8.2096 (1997).
- 488 29 Tse, C., Sera, T., Wolffe, A. P. & Hansen, J. C. Disruption of higher-order folding by core  
489 histone acetylation dramatically enhances transcription of nucleosomal arrays by RNA  
490 polymerase III. *Mol Cell Biol* **18**, 4629-4638 (1998).
- 491 30 Tsompana, M. & Buck, M. J. Chromatin accessibility: a window into the genome.  
492 *Epigenetics & chromatin* **7**, 33, doi:10.1186/1756-8935-7-33 (2014).
- 493 31 Birch, J. L. *et al.* FACT facilitates chromatin transcription by RNA polymerases I and III.  
494 *The EMBO journal* **28**, 854-865, doi:10.1038/emboj.2009.33 (2009).
- 495 32 Helbo, A. S., Lay, F. D., Jones, P. A., Liang, G. & Gronbaek, K. Nucleosome Positioning  
496 and NDR Structure at RNA Polymerase III Promoters. *Scientific reports* **7**, 41947,  
497 doi:10.1038/srep41947 (2017).
- 498 33 Parnell, T. J., Huff, J. T. & Cairns, B. R. RSC regulates nucleosome positioning at Pol II  
499 genes and density at Pol III genes. *The EMBO journal* **27**, 100-110,  
500 doi:10.1038/sj.emboj.7601946 (2008).
- 501 34 Bresnick, E. H., John, S. & Hager, G. L. Histone hyperacetylation does not alter the  
502 positioning or stability of phased nucleosomes on the mouse mammary tumor virus long  
503 terminal repeat. *Biochemistry-Us* **30**, 3490-3497 (1991).
- 504 35 Eberharter, A. & Becker, P. B. Histone acetylation: a switch between repressive and  
505 permissive chromatin. Second in review series on chromatin dynamics. *EMBO reports* **3**,  
506 224-229, doi:10.1093/embo-reports/kvf053 (2002).
- 507 36 Dieci, G., Fiorino, G., Castelnovo, M., Teichmann, M. & Pagano, A. The expanding RNA  
508 polymerase III transcriptome. *Trends in Genetics* **23**, 614-622,  
509 doi:10.1016/j.tig.2007.09.001 (2007).
- 510 37 Orioli, A., Pascali, C., Pagano, A., Teichmann, M. & Dieci, G. RNA polymerase III  
511 transcription control elements: Themes and variations. *Gene* **493**, 185-194,  
512 doi:10.1016/j.gene.2011.06.015 (2012).

- 513 38 Arimbasseri, A. G., Rijal, K. & Marais, R. J. Comparative overview of RNA polymerase II  
514 and III transcription cycles, with focus on RNA polymerase III termination and reinitiation.  
515 *Transcription* **5**, e27639, doi:10.4161/trns.27369 (2014).
- 516 39 Leśniewska, E. & Boguta, M. Novel layers of RNA polymerase III control affecting tRNA  
517 gene transcription in eukaryotes. *Open biology* **7**, 170001, doi:10.1098/rsob.170001  
518 (2017).
- 519 40 Clark, D. J. & Felsenfeld, G. A nucleosome core is transferred out of the path of a  
520 transcribing polymerase. *Cell* **71**, 11-22 (1992).
- 521 41 Studitsky, V. M., Kassavetis, G. A., Geiduschek, E. P. & Felsenfeld, G. Mechanism of  
522 Transcription Through the Nucleosome by Eukaryotic RNA Polymerase. *Science* **278**,  
523 1960-1963, doi:10.1126/science.278.5345.1960 (1997).
- 524 42 Workman, J. L. Nucleosome displacement in transcription. *Genes & development* **20**,  
525 2009-2017, doi:10.1101/gad.1435706 (2006).
- 526 43 Dyer, P. N. *et al.* Reconstitution of nucleosome core particles from recombinant histones  
527 and DNA. *Methods in enzymology* **375**, 23-44 (2004).
- 528 44 Okabe, K. *et al.* Real time monitoring of endogenous cytoplasmic mRNA using linear  
529 antisense 2' -O-methyl RNA probes in living cells. *Nucleic acids research* **39**, e20-e20,  
530 doi:10.1093/nar/gkq1196 (2011).
- 531 45 Ketting, U., Koltermann, A., Schwill, P. & Eigen, M. Real-time enzyme kinetics  
532 monitored by dual-color fluorescence cross-correlation spectroscopy. *Proceedings of the*  
533 *National Academy of Sciences* **95**, 1416-1420, doi:10.1073/pnas.95.4.1416 (1998).
- 534 46 Medina, M. Á. & Schwill, P. Fluorescence correlation spectroscopy for the detection and  
535 study of single molecules in biology. *Bioessays* **24**, 758-764, doi:doi:10.1002/bies.10118  
536 (2002).
- 537 47 Zhang, J., Okabe, K., Tani, T. & Funatsu, T. Dynamic association-dissociation and  
538 harboring of endogenous mRNAs in stress granules. *Journal of cell science* **124**, 4087-  
539 4095, doi:10.1242/jcs.090951 (2011).
- 540 48 Szafranski, P. & Smagowicz, W. J. Relative affinities of nucleotide substrates for the yeast  
541 tRNA gene transcription complex. *Zeitschrift fur Naturforschung. C, Journal of*  
542 *biosciences* **47**, 320-321 (1992).
- 543 49 Verdin, E. & Ott, M. 50 years of protein acetylation: from gene regulation to epigenetics,  
544 metabolism and beyond. *Nature reviews. Molecular cell biology* **16**, 258-264,  
545 doi:10.1038/nrm3931 (2015).
- 546 50 Mishima, Y. *et al.* Hinge and chromoshadow of HP1alpha participate in recognition of K9  
547 methylated histone H3 in nucleosomes. *Journal of molecular biology* **425**, 54-70,  
548 doi:10.1016/j.jmb.2012.10.018 (2013).
- 549 51 Fierz, B. & Muir, T. W. Chromatin as an expansive canvas for chemical biology. *Nat Chem*  
550 *Biol* **8**, 417-427, doi:10.1038/nchembio.938 (2012).
- 551 52 Yanagisawa, T., Umehara, T., Sakamoto, K. & Yokoyama, S. Expanded genetic code  
552 technologies for incorporating modified lysine at multiple sites. *Chembiochem : a*  
553 *European journal of chemical biology* **15**, 2181-2187, doi:10.1002/cbic.201402266 (2014).
- 554 53 Chin, J. W. Expanding and reprogramming the genetic code. *Nature* **550**, 53-60,  
555 doi:10.1038/nature24031 (2017).
- 556 54 Tanaka, Y. *et al.* Expression and purification of recombinant human histones. *Methods* **33**,  
557 3-11, doi:10.1016/j.ymeth.2003.10.024 (2004).
- 558 55 Wakamori, M., Umehara, T. & Yokoyama, S. A tandem insertion vector for large-scale  
559 preparation of nucleosomal DNA. *Analytical biochemistry* **423**, 184-186,  
560 doi:10.1016/j.ab.2012.01.010 (2012).
- 561 56 Wang, H. *et al.* Glutaraldehyde Modified Mica: A New Surface for Atomic Force  
562 Microscopy of Chromatin. *Biophysical journal* **83**, 3619-3625, doi:10.1016/S0006-  
563 3495(02)75362-9 (2002).
- 564 57 Birkenmeier, E. H., Brown, D. D. & Jordan, E. A nuclear extract of *Xenopus laevis* oocytes  
565 that accurately transcribes 5S RNA genes. *Cell* **15**, 1077-1086 (1978).

566

567 **Figure Legends**

568 **Figure 1.** Schematic diagram of 5S rRNA chromatin transcription and its real-time  
569 detection.

570

571 **Figure 2.** Reconstitution of H4-tetra-acetylated di-nucleosomes for chromatin  
572 transcription. (A) Scheme of di-nucleosome rRNA gene cassettes. Internal control  
573 regions (box A; IE, intermediate element; box C) of the 5S rRNA gene are indicated. The  
574 X5S197-2 construct<sup>28</sup> (top) was modified by introducing a *c-fos* probe sequence (bottom)  
575 for fluorescence correlation spectroscopy measurements. (B) Western blotting of  
576 unmodified and site-specifically tetra-acetylated histone H4 proteins. Kac, acetylated  
577 lysine. (C, D) Atomic force microscopy images of 5S rRNA di-nucleosomes reconstituted  
578 with unmodified histone H4 (C) or K5/K8/K12/K16-acetylated H4 (D). (E) Di-nucleosome  
579 digestion with micrococcal nuclease (MNase). Lanes 1, 3, 5, 7 and 9, di-nucleosomes  
580 with unmodified H4; lanes 2, 4, 6, 8 and 10, di-nucleosomes with K5/K8/K12/K16-  
581 acetylated H4. Lanes 1 and 2, di-nucleosomes were incubated in MNase reaction buffer  
582 in the absence of MNase. Units of MNase (Takara, cat. #2910A) per microgram DNA:  
583 lanes 3 and 4, 2.5; lanes 5 and 6, 5.0; lanes 7 and 8, 10, lanes 9 and 10, 20. (F) Agarose  
584 gel electrophoreses of di-nucleosomes constructed with *c-fos*-derived annealing  
585 sequence DNA. Lane M, DNA ladder marker (NEB, cat. N3232S); lane 1, di-nucleosome  
586 reconstituted with unmodified H4; lane 2, di-nucleosome reconstituted with  
587 K5/K8/K12/K16-tetra-acetylated H4.

588

589 **Figure 3.** Real-time detection of chromatin transcription. (A) Scheme of a Cy3-labeled  
590 antisense 2'-O-methyl RNA (2OMe-RNA) probe and its hybridization with mRNA. (B)

591 Scheme of the setup of fluorescence correlation spectroscopy (FCS) for monitoring  
592 mRNA synthesis. Changes in diffusion of the antisense probe upon hybridization with  
593 transcripts in the confocal volume were detected by an avalanche photodiode (APD) at  
594 the single-molecule level. (C) Fluorescence autocorrelation functions [FAF,  $G(\tau)$ ] in  
595 reaction solutions. FAF of the antisense probe with mRNA showed longer correlation  
596 time than that without mRNA or that of a control probe with mRNA. (Inset) averaged  
597 diffusion time of antisense probes. (D) Calibration of the averaged diffusion time of the  
598 antisense 5S/*c-fos* RNA probe molecules as a function of their concentration. In (C) and  
599 (D), RNA was transcribed by T7 RNA polymerase from two tandem copies of the 5S rRNA  
600 gene (Fig. 2A) and added to a *Xenopus* oocyte nuclear extract without template DNA;  
601 diffusion time was measured by FCS. Mean  $\pm$  standard deviation ( $N = 3$ ). (E) Real-time  
602 detection of nascent 5S rRNA transcripts. Template DNAs used are shown in: gray, naked  
603 5S rRNA gene without *c-fos* sequence; black, naked 5S rRNA gene containing the *c-fos*-  
604 derived annealing sequence; red, H4-tetra-acetylated di-nucleosome 5S rRNA gene  
605 containing *c-fos* sequence; and blue, non-acetylated di-nucleosome 5S rRNA gene  
606 containing *c-fos* sequence.

607

608 **Figure 4.** Mathematical model of chromatin transcription. (A) Explanation of modeling  
609 of chromatin transcription. Variables are defined in Supplementary Table 1. (B, C)  
610 Explanation of the obtained equations. (B) Transcription from chromatin [equation (4)].  
611 (C) Transcription from naked DNA [equation (5)]. (D, E) Numerical simulation of  
612 chromatin transcription with different  $k_{4Kac}$  (D) and different  $\alpha_{4Kac}$  (E).  $\gamma = 0.01$   
613  $\text{nM min}^{-1}$  and  $k_p = 1/15 \approx 0.0667 \text{ min}^{-1}$  are fixed.  $Z_\xi$  is the concentration of  
614 transcribed RNA, where  $\xi$  is '4Kac' or 'naked'. For '4Kac', equation (4) is used, where

615  $k_{4Kac}$  is changed with  $\alpha_{4Kac} = \alpha_{naked} = 1$  fixed (D) or  $\alpha_{4Kac}$  is changed with  
616  $\alpha_{naked} = 1$  and  $k_{4Kac} = 0.1 \text{ min}^{-1}$  fixed (E). For ‘naked’, equation (5) is used.

617

618 **Figure 5.** Results of fitting to the mathematical model. (A) Determination of  $\gamma$  and  $k_p$ .

619 First, the  $\gamma$  value was determined by fitting the linear region (12–17 min) of the

620 experimental data for the naked DNA (+ *c-fos*) to the mathematical model  $Z_{naked} =$

621  $\gamma t + z_1$ , where  $z_1$  is the intercept; this equation is the long-term limit of equation (5).

622 As a result,  $\gamma = 0.046 \pm 0.003 \text{ nM min}^{-1}$  (‘fitting value’  $\pm$  ‘fitting error’) ( $z_1 = -0.29 \pm 0.04$

623  $\text{nM}$ ; coefficient of determination  $R^2 = 0.998$ ). Then, using the obtained  $\gamma$ , the  $k_p$  value

624 was determined by fitting the whole region (0–17 min) of the data to the mathematical

625 model  $Z_{naked} = \gamma \left[ t - (1 - e^{-k_p t}) / k_p \right] + z_2$ , where  $z_2$  is the intercept introduced

626 for resolving experimental error at the initial stage [equation (5)]. As a result,  $k_p = 0.13$

627  $\pm 0.006 \text{ min}^{-1}$  ( $z_2 = -0.010 \pm 0.006 \text{ nM}$ ;  $R^2 = 0.993$ ). (B) Fitting results for each condition.

628  $Z_\xi$  is the concentration of transcribed RNA, where  $\xi$  is ‘4Kac’, ‘unmod’, or ‘naked’

629 [equations (4) and (5)].  $\gamma = 0.046 \text{ nM min}^{-1}$  and  $k_p = 0.13 \text{ min}^{-1}$ , which were obtained in

630 (A), were used for fitting. (C) Schematic illustration of acceleration of chromatin

631 transcription by histone H4 acetylation.



**Figure 1**

(1) Chromatin accessibility

Unmodified chromatin

Acetylated chromatin

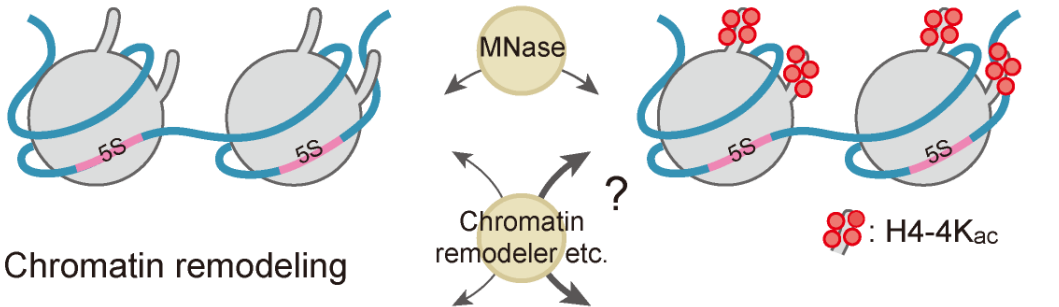

(2) Chromatin remodeling

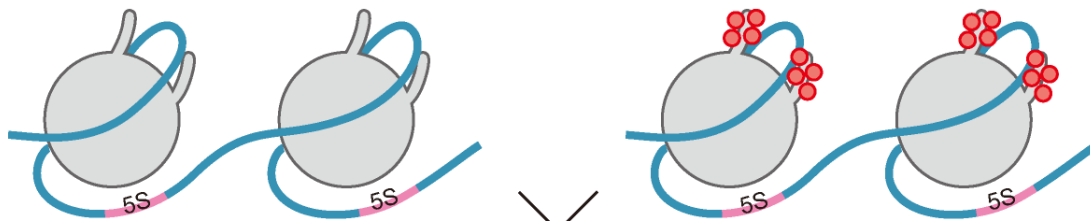

(3) Priming before transcription

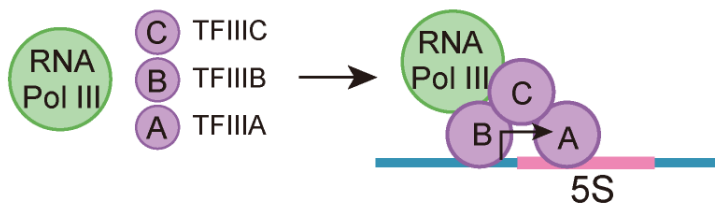

(4) 5S rRNA transcription

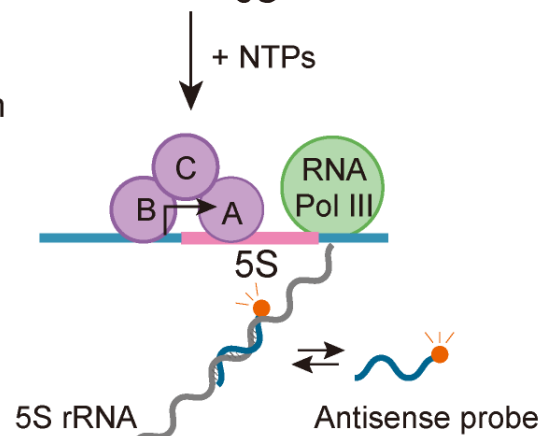

**Figure 2**

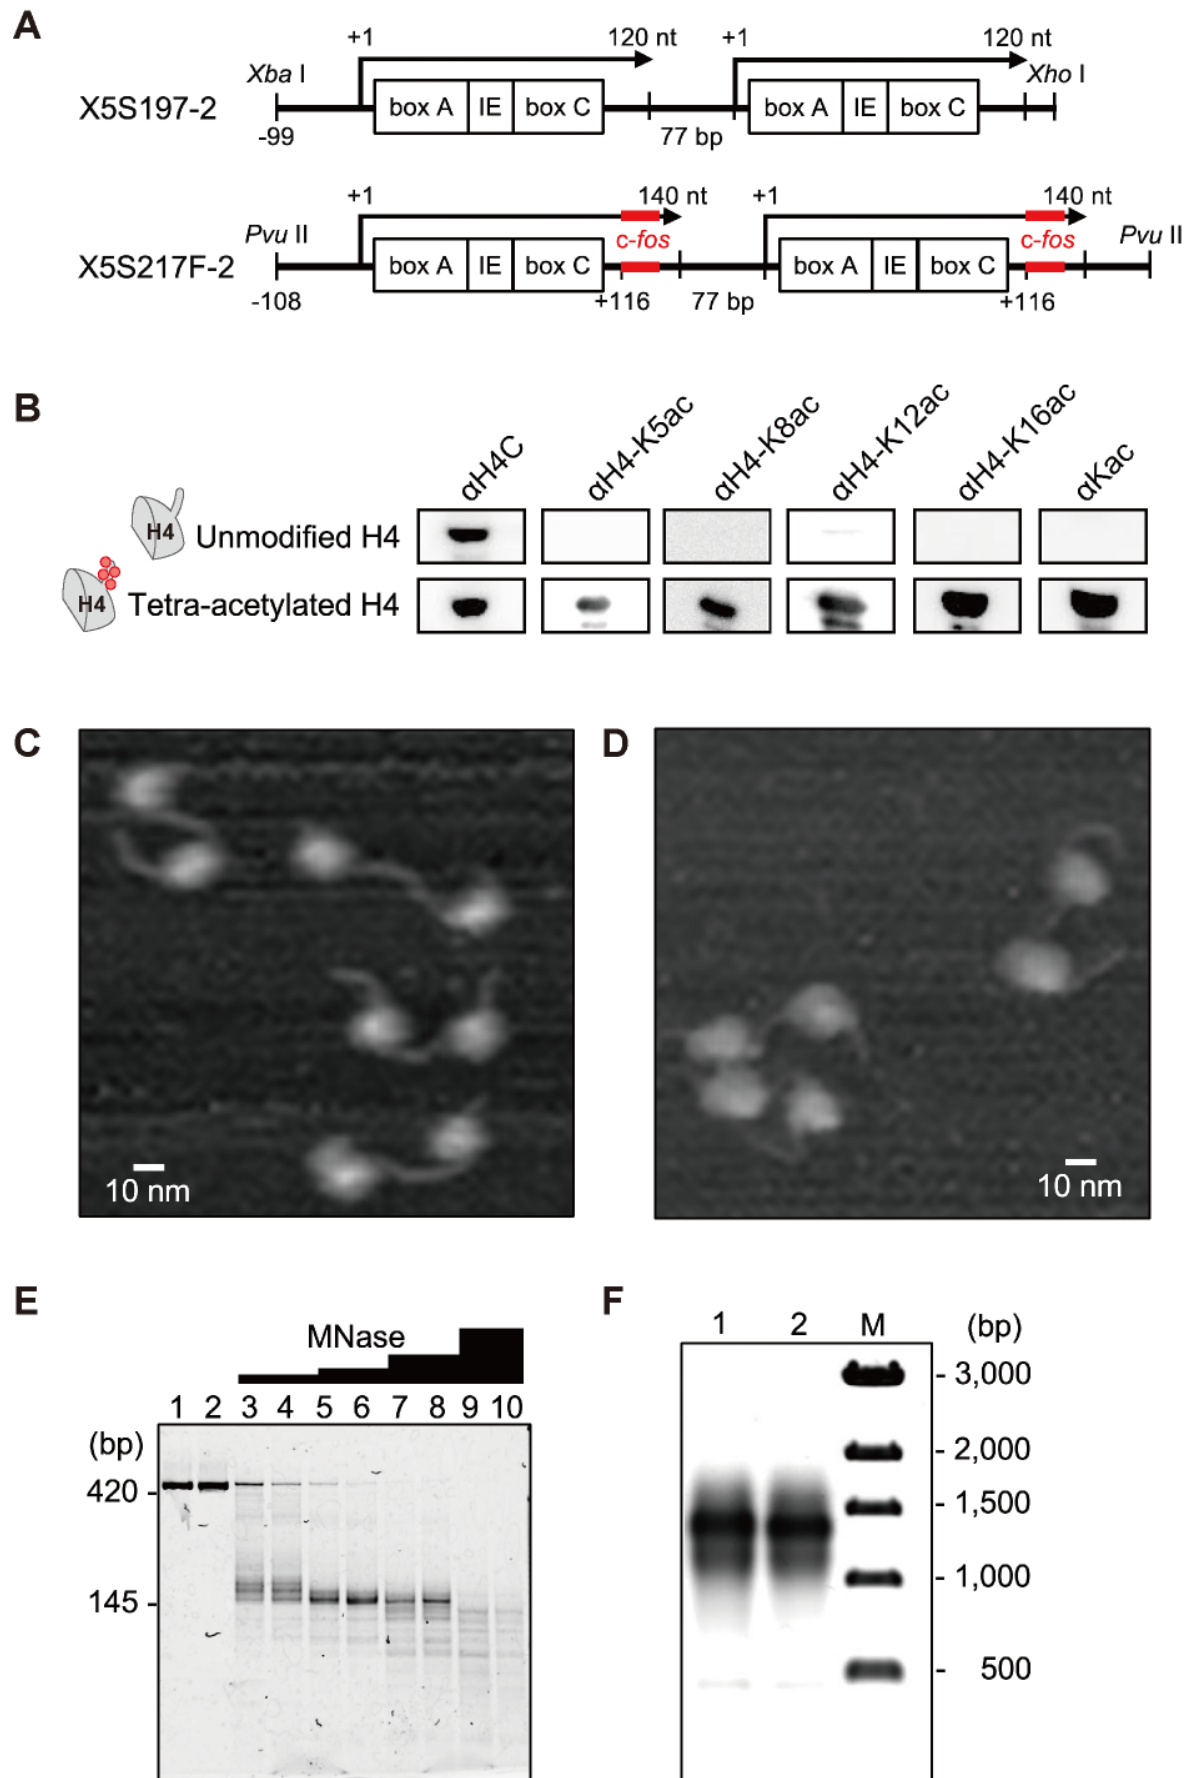

**Figure 3**

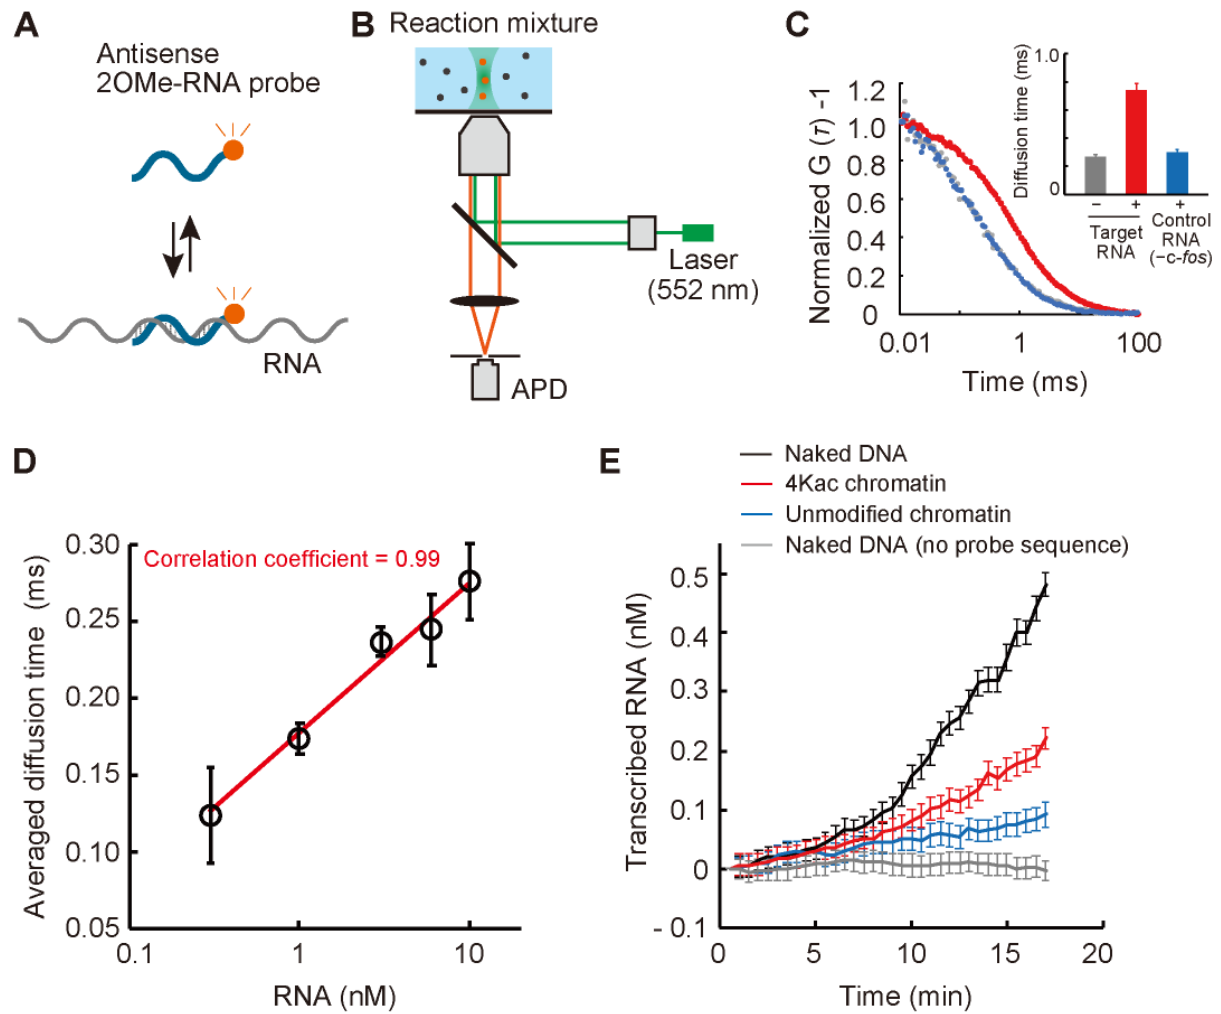

**Figure 4**

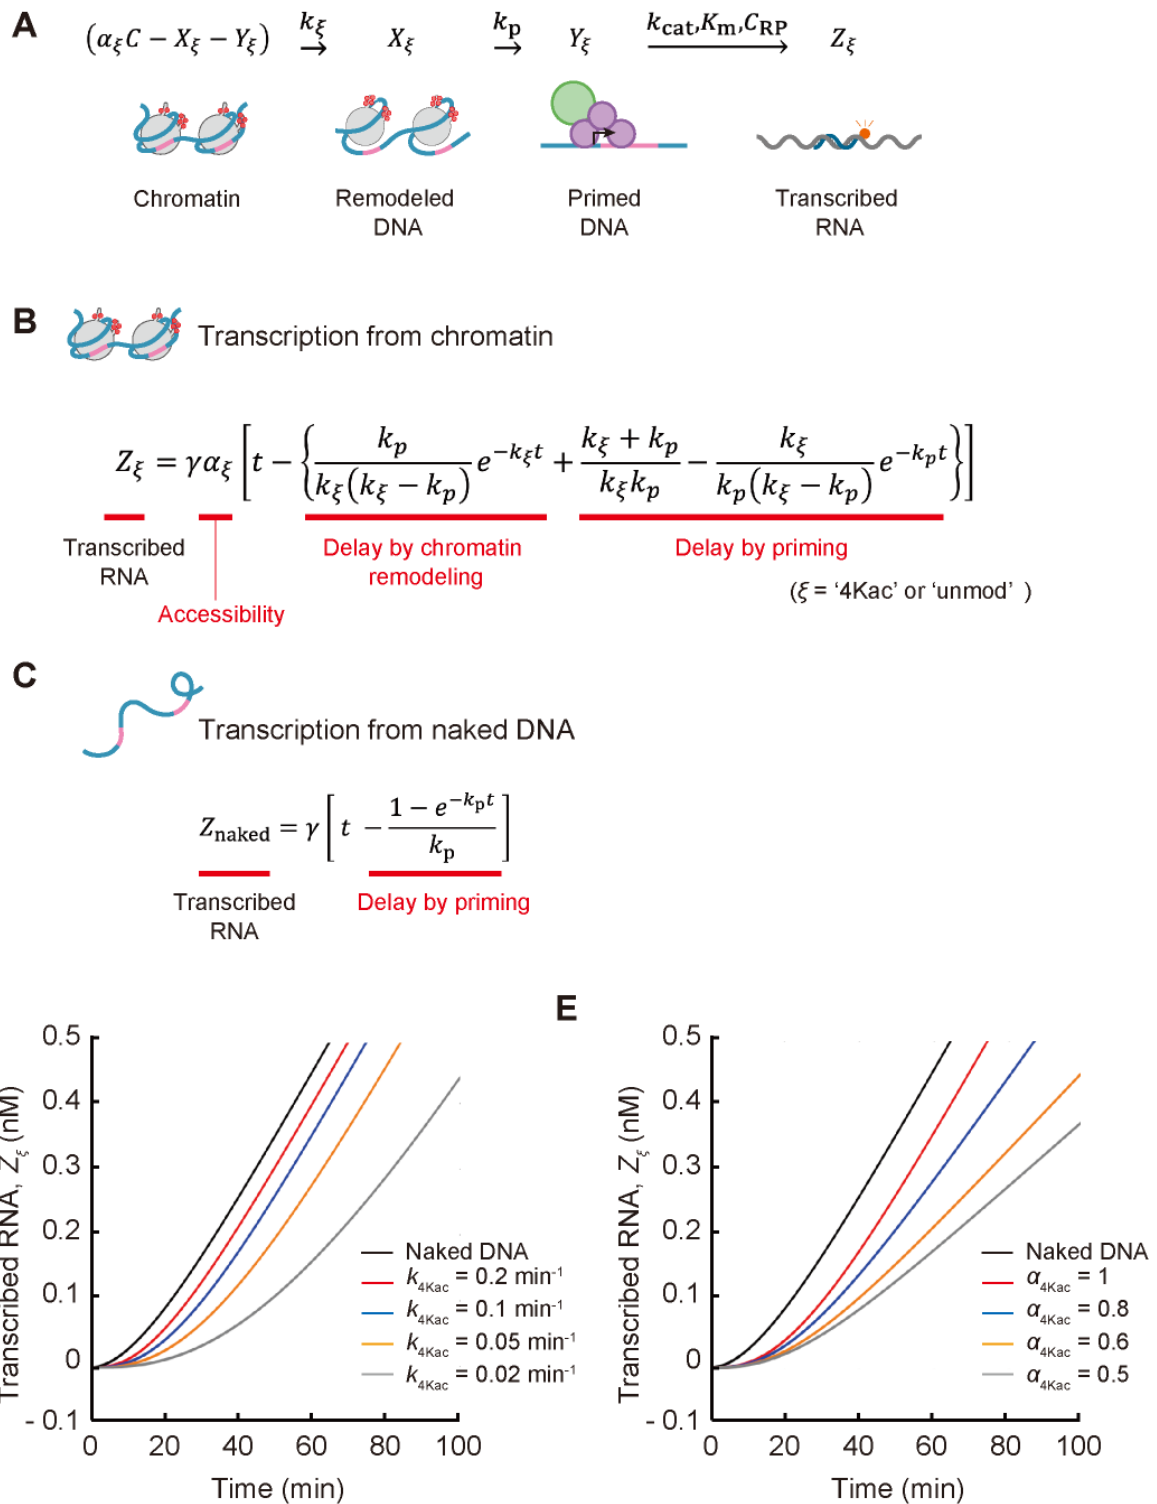

**Figure 5**

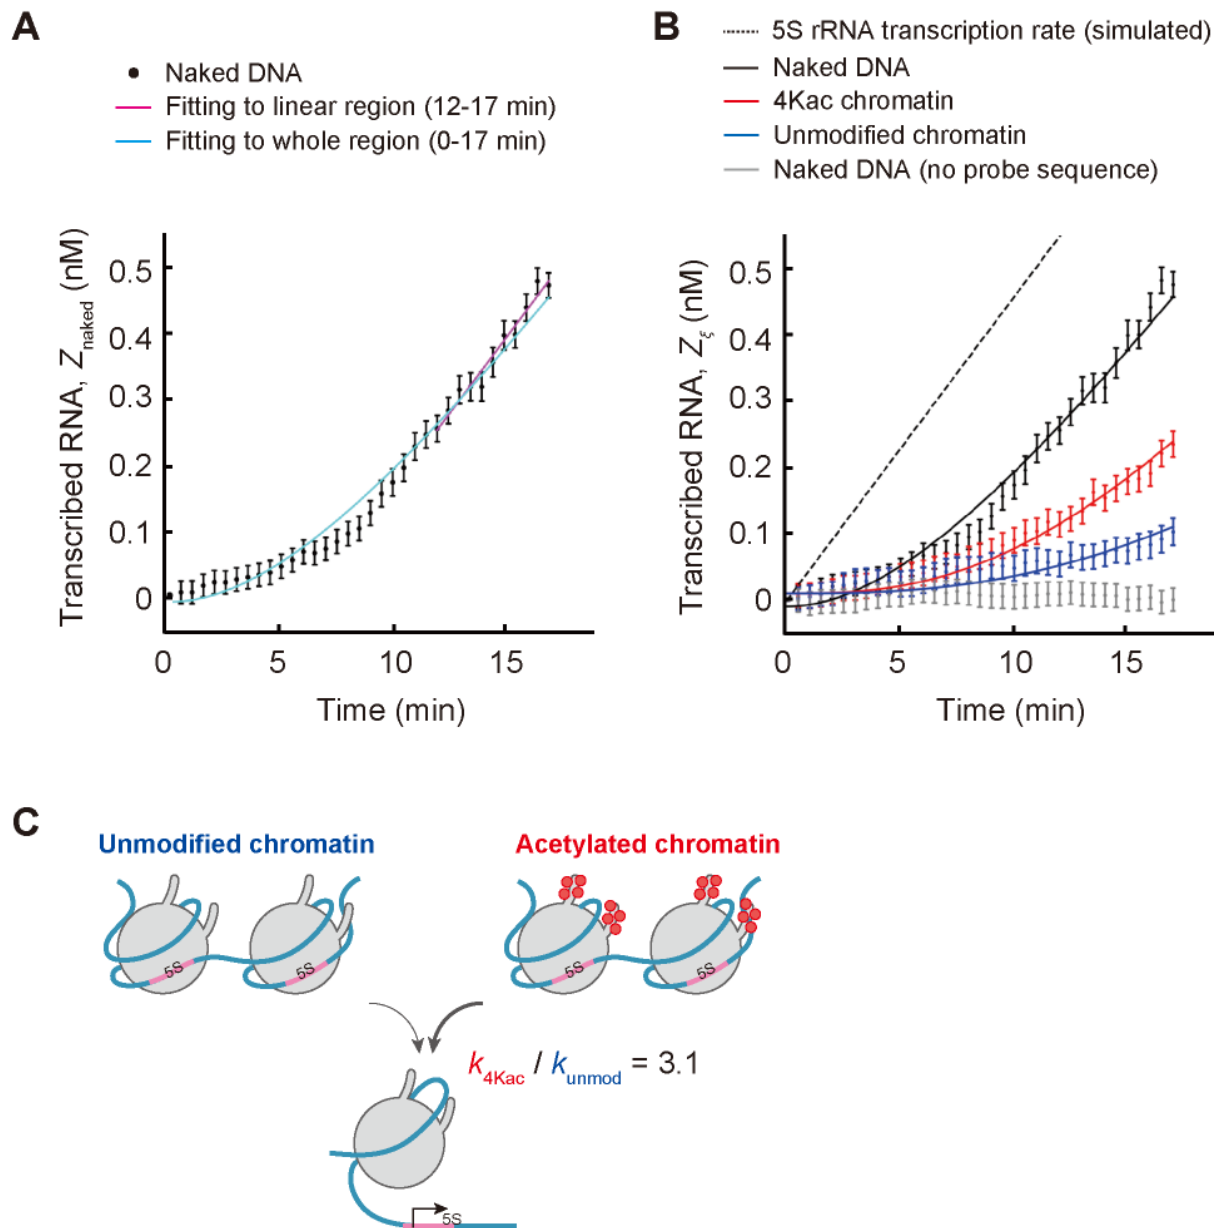

Source: https://www.biorxiv.org/content/10.1101/679944v2.full.pdf
